# Supplementary material for: A Flexible Genome-Scale Resource of SARS-CoV-2 Coding Sequence Clones
Source: Preprints.org preprint supplement (doi:10.20944/preprints202004.0009.v2), 2020-05-04
Supplement: Supplementary file 2 [file Supplementary Table 1.xlsx]

## Sheet: Sheet1
Primer name	Sequence (5' - 3')	Purpose
M13F	GTAAAACGACGGCCAGT	Sanger sequence clones with a pDONR223 backbone
M13R	CAGGAAACAGCTATGAC	Sanger sequence clones with a pDONR223 backbone
pDONR207_Seq_F	TCGCGTTAACGCTAGCATGGATCT	Sanger sequence clones with a pDONR207 backbone
pDONR207_Seq_R	GTAACATCAGAGATTTTGAGACAC	Sanger sequence clones with a pDONR207 backbone
NSP1_Open_F1	CTGAACGGTGGCTACCCAACTTTCTTG	Amplify pDONR207-NSP1 without a termination codon
NSP1_Open_R1	TTCACGCATCAGCTCTCTGGTC	Amplify pDONR207-NSP1 without a termination codon
NSP-2_Open_F1	CCTGAAGGGAGGTTACCCAACTTTCTTG	Amplify pDONR223-NSP2 without a termination codon
NSP-2_Open_R1	GTGAAGGTGTTGTTGGTCACC	Amplify pDONR223-NSP2 without a termination codon
PLPRO_Open_F1	CCTGAAGGGCGGATACCCAACTTTCTTG	Amplify pDONR207-NSP3-PLPRO without a termination codon
PLPRO_Open_R1	GCGATCTTGGTGGTCACCAC	Amplify pDONR207-NSP3-PLPRO without a termination codon
NSP-4_Open_F1	CCGTGCTGCAGTACCCAACTTTCTTG	Amplify pDONR223-NSP4 without a termination codon
NSP-4_Open_R1	CGCTGGTGATAGAGGTCTGAG	Amplify pDONR223-NSP4 without a termination codon
NSP-5_Open_F1	GTGTGACCTTCCAGTACCCAACTTTCTTG	Amplify pDONR223-NSP5 without a termination codon
NSP-5_Open_R1	CAGAGCACTGCCTCACCAC	Amplify pDONR223-NSP5 without a termination codon
NSP-6_Open_F1	GCCACCGTGCAGTACCCAACTTTCTTG	Amplify pDONR223-NSP6 without a termination codon
NSP-6_Open_R1	CACCTTGATGCATGGCTTTCCG	Amplify pDONR223-NSP6 without a termination codon
NSP7_Open_F1	GGCTACCCTGCAGTACCCAACTTTCTTG	Amplify pDONR223-NSP7 without a termination codon
NSP7_Open_R1	CTGTTGTCCAGCATTTCCTCGC	Amplify pDONR223-NSP7 without a termination codon
NSP-8_Open_F1	CCGTGAAGCTGCAGTACCCAACTTTCTTG	Amplify pDONR223-NSP8 without a termination codon
NSP-8_Open_R1	CAGAGTTAGCGCGCAGGG	Amplify pDONR223-NSP8 without a termination codon
NSP-9_Open_F1	GTGAGGCTGCAGTACCCAACTTTCTTG	Amplify pDONR223-NSP9 without a termination codon
NSP-9_Open_R1	GGTAGCAGCCAGGCTACC	Amplify pDONR223-NSP9 without a termination codon
NSP-10_Open_F1	GAACCTATGCTGCAGTACCCAACTTTCTTG	Amplify pDONR223-NSP10 without a termination codon
NSP-10_Open_R1	CCTCAGCTGGTCGCAAGAG	Amplify pDONR223-NSP10 without a termination codon
RNApol_Open_F1	CACCGTGCTGCAGTACCCAACTTTCTTG	Amplify pDONR223-NSP12-RNApol without a termination codon
RNApol_Open_R1	TGAGGGGTGTACATGGCCTCG	Amplify pDONR223-NSP12-RNApol without a termination codon
Heli_Open_F1	GCTACCCTGCAGTACCCAACTTTCTTG	Amplify pDONR223-NSP13-Heli without a termination codon
Heli_Open_R1	CACGTTCCTGCGGGGG	Amplify pDONR223-NSP13-Heli without a termination codon
NSP-14_Open_F1	CACCAGGCTGCAGTACCCAACTTTCTTG	Amplify pDONR223-NSP14 without a termination codon
NSP-14_Open_R1	AAGGTGTTCCACAGGTTGTAGGTG	Amplify pDONR223-NSP14 without a termination codon
NSP-15_Open_F1	CCTAAGCTGCAGTACCCAACTTTCTTG	Amplify pDONR223-NSP15 without a termination codon
NSP-15_Open_R1	GTAGAAGGTTTCCACGTGGC	Amplify pDONR223-NSP15 without a termination codon
NSP-16_Open_F1	GTGCTGGTGAACAACTACCCAACTTTCTTG	Amplify pDONR223-NSP16 without a termination codon
NSP-16_Open_R1	GTCAGAGGAGATGACCACTCTG	Amplify pDONR223-NSP16 without a termination codon
attB_S-Roth_F	GGGGACAACTTTGTACAAAAAAGTTGGCATGTTCGTGTTCCTGGTGC	Amplify S with Gateway compatible attB sites
attB_S-RothO_R2	GGGGACAACTTTGTACAAGAAAGTTGGGTAGGTGTAGTGCAGCTTCAC	Amplify S without termination codon with Gateway compatible attB sites
ORF3A_Open_F1	CTCCGTGCCACTGTACCCAACTTTCTTG	Amplify pDONR207-ORF3A without a termination codon
ORF3A_Open_R1	GTGGTGGTGGTAGGTTCGTCG	Amplify pDONR207-ORF3A without a termination codon
3b_Open_F1	CTGCTGGCCTTACCCAACTTTCTTG	Amplify pDONR223-ORF3B without a termination codon
3b_Open_R1	CATCTAGCGAAGGGGGTCAG	Amplify pDONR223-ORF3B without a termination codon
E_Open_F1	GACCTGCTGGTGTACCCAACTTTCTTG	Amplify pDONR207-E without a termination codon
E_Open_R1	AGGCACCCTGGAGCTGTTC	Amplify pDONR207-E without a termination codon
M_Open_F1	CCTGCTGGTGCAGTACCCAACTTTCTTG	Amplify pDONR207-M without a termination codon
M_Open_R1	GCGATGTTGTCGCTAGAGGAGC	Amplify pDONR207-M without a termination codon
6_Open_F1	CATGGAAATCGACTACCCAACTTTCTTG	Amplify pDONR223-ORF6 without a termination codon
6_Open_R1	GGCTGTTCCTCGTCCAG	Amplify pDONR223-ORF6 without a termination codon
ORF7A_Open_F1	GAAGCGTAAGACCGAATACCCAACTTTCTTG	Amplify pDONR207-ORF7A without a termination codon
ORF7A_Open_R1	AGGGTGAAGCACAGGGTGATG	Amplify pDONR207-ORF7A without a termination codon
7b_Open_F1	CCTGCCACGCTTACCCAACTTTCTTG	Amplify pDONR223-ORF7B without a termination codon
7b_Open_R1	TTTCGTTGTGGTCCTGCAG	Amplify pDONR223-ORF7B without a termination codon
8_Open_F1	GTGCTGGACTTCATCTACCCAACTTTCTTG	Amplify pDONR223-ORF8 without a termination codon
8_Open_R1	CACACGCACGTCGTGG	Amplify pDONR223-ORF8 without a termination codon
attB_N-Roth_F	GGGGACAACTTTGTACAAAAAAGTTGGCATGTCCGACAACGGTCC	Amplify N with Gateway compatible attB sites
attB_N-RothO_R2	GGGGACAACTTTGTACAAGAAAGTTGGGTAAGCCTGGGTGGAGTCAG	Amplify N without termination codon with Gateway compatible attB sites
9b_Open_F1	GTGGTGACCGTGAAGTACCCAACTTTCTTG	Amplify pDONR223-ORF9B without a termination codon
9b_Open_R1	CACGAATTCGTCGGGCAG	Amplify pDONR223-ORF9B without a termination codon
9Bwu_AttB_F	GGGGACAACTTTGTACAAAAAAGTTGGCATGCTGCAATCGTGCTAC	Amplify ORF9Bwu from N gene with Gateway compatible attB sites
9Bwu_AttB_R1	GGGGACAACTTTGTACAAGAAAGTTGGGTATCAATCTGTCAAGCAGCAG	Amplify ORF9Bwu with a termination codon from N gene with Gateway compatible attB sites
9Bwu_AttBopen_R2	GGGGACAACTTTGTACAAGAAAGTTGGGTAATCTGTCAAGCAGCAG	Amplify ORF9Bwu without a termination codon from N gene with Gateway compatible attB sites
attB_10wu_F1	GGGGACAACTTTGTACAAAAAAGTTGGCATGGGCTACATCAACGTGTTC	Amplify ORF10Bwu with Gateway compatible attB sites
attB_10wuOpen_R1	GGGGACAACTTTGTACAAGAAAGTTGGGTAGGTCAGGTTGAAGTTCAC	Amplify ORF10Bwu without termination codon with Gateway compatible attB sites
